# Supplementary material for: Personal Health Record for Personalizing Research and Care Trajectories: A Proof of Concept Pilot with Diet in Inflammatory Bowel Diseases
Source: MDPI journal article supplement (doi:10.3390/jpm13040601), 2023-03-29
Supplement: s1 [file s1]

# Mai+Science & Mai+Life Screenshots

Phaitality

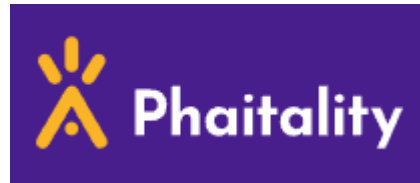

# Mai+Life: Benaderbaarheid

FileEditViewHistoryBookmarksToolsHelp

Mai+Life x +

https://ibd-pilot.mai-life.nl/app/?code=NXrVaQiEaMYVK4a5SPOE6aACjh01SS

Mai+Life

Benaderbaarheid voor studies

Hier kunt u aangeven of u benaderbaar bent voor studies

In Mai+Life zitten veel gegevens die van belang zijn voor wetenschappelijk onderzoek. Mogen onderzoekers u benaderen met een uitnodiging om bij te dragen aan wetenschappelijk onderzoek? Dit betekent dat u in Mai+Life een bericht ontvangt met informatie over een wetenschappelijke studie waar u een geschikte deelnemer voor bent. U bent dan nergens toe verplicht. U kunt per uitnodiging beslissen of u hierop in wilt gaan.

U kunt uw voorkeur altijd weer wijzigen in Mai+Life onder delen - toestemmingen en aangeven dat u niet meer wilt worden uitgenodigd om bij te dragen aan wetenschappelijk onderzoek. Uiteraard worden uw gegevens altijd alleen maar gebruikt als u daar uitdrukkelijk mee akkoord gaat.

Onderzoekers hebben geen toegang tot gegevens in Mai+Life. Een onderzoeker geeft criteria op (zoals leeftijdscategorie, geslacht en diagnose) om mensen te benaderen voor een studie. Vervolgens kan Mai+Life een selectie maken van gebruikers die benaderbaar zijn en aan de criteria voldoen. Mai+Life geeft dan alleen aan hoeveel gebruikers aan de criteria voldoen. Daarna kan de onderzoeker deze gebruikers uitnodigen voor de studie. Deelnemers in Mai+Life blijven anoniem voor de onderzoeker.

☒ Ik wil meedoen aan studies en ik geef toestemming om hiervoor benaderd te worden.

KLAAR

# Mai+Life: Onderzoek

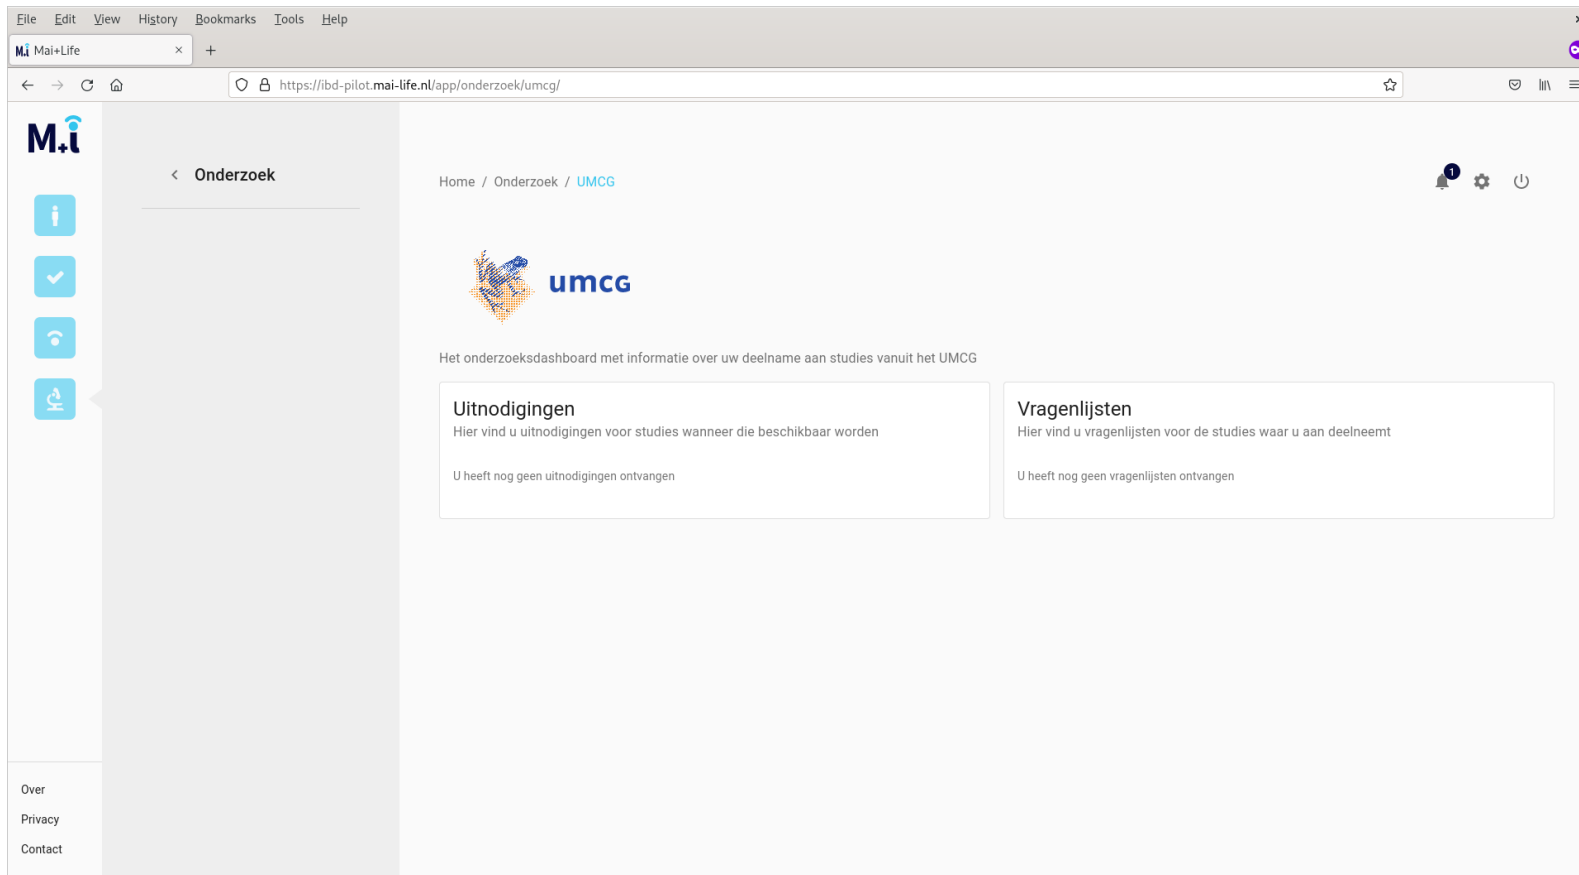

# Mai+Science dashboard

The screenshot shows a web browser window with the address bar displaying 'ibd-pilot.mai-science.nl/studies/'. The page has a red header bar with the 'Mai.science' logo on the left and a user profile icon on the right. The main content area is titled 'Studies' and contains a table with two rows of study data. Each row has a 'VIEW' button on the right. The footer of the page displays 'Mai+Science'.

| Title          | Study number | CTC status     | Planned startdate |                      |
|----------------|--------------|----------------|-------------------|----------------------|
| Mai.IBD        | 20204711     | STUDY_ACCEPTED | 4 August 2021     | <a href="#">VIEW</a> |
| Parelsnoer IBD | 201400286    | STUDY_ACCEPTED | 18 May 2010       | <a href="#">VIEW</a> |

# Mai+Science:Study Dashboard

The screenshot shows a web browser window with the address bar displaying 'ibd-pilot.mai-science.nl/studies/6/#start'. The browser's address bar also shows 'Incognito' and a star icon. The website's header is a red bar with the 'Mai.science' logo on the left and a user profile icon on the right. Below the header is a navigation bar with five tabs: 'DASHBOARD' (selected), 'CONSENT & INFORMATION LETTER', 'MATCHING', 'PARTICIPANTS', and 'QUESTIONNAIRES'. The main content area is divided into two columns. The left column, titled 'Study details', lists various study parameters: Title (Parelsnoer IBD), Study number (201400286), Target participant number (5000), Researcher (G Dijkstra), Principal investigator (G Dijkstra), CTC status (STUDY\_ACCEPTED), CTC approved date (10 August 2021 21:18), created on (10 August 2021), Planned startdate (18 May 2010), and Planned enddate (31 December 2025). The right column, titled 'How Mai+Science works', contains two paragraphs explaining the study process and the user's role.

**Study details**

**Title**  
Parelsnoer IBD

**Study number**  
201400286

**Target participant number**  
5000

**Researcher**  
G Dijkstra

**Principal investigator**  
G Dijkstra

**CTC status**  
STUDY\_ACCEPTED

**CTC approved date**  
10 August 2021 21:18

**created on**  
10 August 2021

**Planned startdate**  
18 May 2010

**Planned enddate**  
31 December 2025

**How Mai+Science works**

You are now looking at the details of a study. Mai+Science is in connection with Mai+Life, a personal health environment. Some actions you perform in Mai+Science have consequences for users in Mai+Life. In Mai+Life the users are asked if they want to participate in studys. If they answer yes these users are included in the matching in Mai+Science. If a user matches the matching criteria he will recieve the invitation you make in Mai+Science. After the user accepts this invitation you can send this user questionnaires. In the future Mai+Science would also like to facilitate you to give back results of the study.

To the left you see the details of this study.

At the top you see multiple tabs. To start the proces of including participants first upload information about the study for the participants. Under consent & information letter you can add a pdf of the study information letter and adjust and add informed consent questions. The participant will, after being matched for this study, recieve an invitation containing the informtion letter and informed consent questions. In the picture below you can see the link between the screens.

# Mai+Science: Consent & Information Letter

Mai+Science

ibid-pilot.mai-science.nl/studies/6/#info

Incognito

Mai+science

DASHBOARD

CONSENT & INFORMATION LETTER

MATCHING

PARTICIPANTS

QUESTIONNAIRES

Informed Consent Template

Edit the informed consent template to fit this study

IBD Pilot

- Ik heb de informatiebrief gelezen <versienummer, datum>. Ook kon ik vragen stellen. Mijn vragen zijn voldoende beantwoord. Ik had genoeg tijd om te beslissen of ik meedoe.\*
- Ik weet dat meedoen vrijwillig is. Ook weet ik dat ik op ieder moment kan beslissen om niet mee te doen of te stoppen met het onderzoek. Daarvoor hoef ik geen reden te geven. Mijn behandeling verandert niet door wel of geen deelname aan onderzoek.\*
- Ik geef toestemming voor het verzamelen, gebruiken en bewaren van mijn gegevens (waaronder ook beeldmateriaal) en /of lichaamsmateriaal op de manier en voor de doelen zoals omschreven in de informatiebrief.\*
- Ik weet dat voor controle van het onderzoek sommige mensen toegang tot al mijn gegevens kunnen krijgen. Die mensen staan vermeld in deze informatiebrief. Ik geef toestemming voor inzage door deze personen.\*
- Ik weet dat mijn gegevens nog 15 jaar in het UMCG bewaard worden.\*
- Ik geef toestemming om mijn gegevens en/of lichaamsmateriaal na dit onderzoek te bewaren en te gebruiken voor ander onderzoek of vervolgonderzoek in het eigen ziekenhuis gerelateerd aan dit onderzoek, zoals in de informatiebrief staat vermeld:
- Ik geef toestemming om mij opnieuw te benaderen voor eventuele deelname aan vervolgonderzoek betrekking tot IBD of het verstrekken van extra gegevens en lichaamsmateriaal, zoals in de informatiebrief staat vermeld:
- Ik geef toestemming om zo nodig bij de gemeente waar u woont informatie uit het basisregister op te vragen om in de toekomst op de hoogte te blijven van de juiste persoonsgegevens.
- Ik geef toestemming om mijn individuele resultaten uit het onderzoek terug te sturen naar mijn PGO bevindingen, zoals omschreven in de informatiebrief.\*
- Ik geef toestemming voor het informeren van mijn huisarts en/of behandelend specialist van onverwachte bevindingen die van belang (kunnen) zijn voor mijn gezondheid, zoals omschreven in de informatiebrief.

EDIT

Information Letter

Add an information letter to inform the participants of the study

No study information letter provided yet. Upload a study information letter by clicking 'upload'.

UPLOAD

Mai+Science

# Mai+Science: Matching

Mai+Science

ibid-pilot.mai-science.nl/studies/5/matching-requests/25/wizard/

Incognito

Maï.science

View

Please check the following criteria for this matching request, and press 'next'.

Age

16 - 80

Data

There are no criteria specified for this matching request

Gender

MaleFemale

Problem (DHD)

0000086468

CANCEL

NEXT

✓ Criteria

2 View

3 Search

4 Confirmation

5 Invite

Mai+Science

# Mai+Life: Uitnodiging

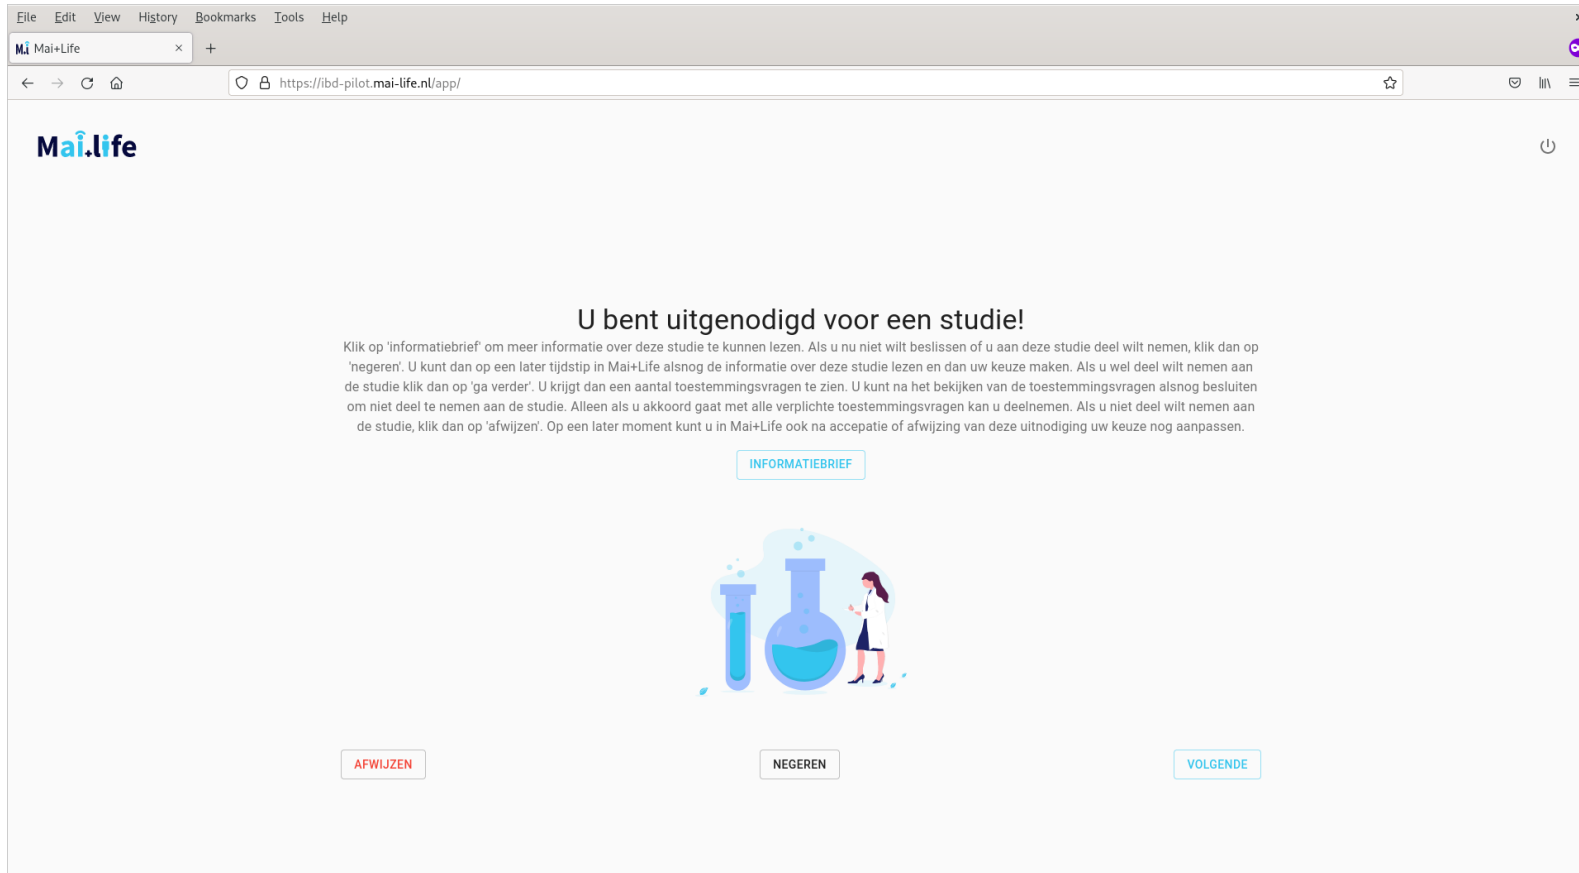



# Mai+Life: Toestemming

FileEditViewHistoryBookmarksToolsHelp

Mai+Life x +

https://ibd-pilot.mai-life.nl/app/90% ☆



## Toestemmingsvragen

Lees de volgende toestemmingsvragen aandachtig door. Indien u akkoord bent met een toestemmingsvraag kunt u deze aanvinken. De vragen met een rood sterretje zijn verplicht. Indien u niet akkoord wilt gaan met een van deze vragen kunt u niet deelnemen aan de studie. U kunt dan klikken op 'afwijzen'. Als u alle (verplichte) toestemmingsvragen heeft geaccepteerd kunt u klikken op 'accepteren'. U doet dan mee aan de studie. U kunt te allen tijde uw toestemming aanpassen in Mai+Life.

☒ Ik heb de informatiebrief gelezen, versie 1, 26 juli 2021. Ook kon ik vragen stellen. Mijn vragen zijn voldoende beantwoord. Ik had genoeg tijd om te beslissen of ik meedoe.\*

☒ Ik weet dat meedoen vrijwillig is. Ook weet ik dat ik op ieder moment kan beslissen om niet mee te doen of te stoppen met het onderzoek. Daarvoor hoef ik geen reden te geven. Mijn behandeling verandert niet door wel of geen deelname aan onderzoek.\*

☒ Ik geef toestemming voor het verzamelen, gebruiken en bewaren van mijn gegevens (waaronder ook beeldmateriaal) en /of lichaamsmateriaal op de manier en voor de doelen zoals omschreven in de informatiebrief.\*

☒ Ik weet dat voor controle van het onderzoek sommige mensen toegang tot al mijn gegevens kunnen krijgen. Die mensen staan vermeld in deze informatiebrief. Ik geef toestemming voor inzage door deze personen.\*

☒ Ik weet dat mijn gegevens nog 15 jaar in het UMCG bewaard worden.\*

☒ Ik geef toestemming om mijn gegevens en/of lichaamsmateriaal na dit onderzoek te bewaren en te gebruiken voor ander onderzoek of vervolgonderzoek in het eigen ziekenhuis gerelateerd aan dit onderzoek, zoals in de informatiebrief staat vermeld:

☒ Ik geef toestemming om mij opnieuw te benaderen voor eventuele deelname aan vervolgonderzoek betrekking tot IBD of het verstrekken van extra gegevens en lichaamsmateriaal, zoals in de informatiebrief staat vermeld:

☒ Ik geef toestemming om zo nodig bij de gemeente waar u woont informatie uit het basisregister op te vragen om in de toekomst op de hoogte te blijven van de juiste persoonsgegevens.

☒ Ik geef toestemming om mijn individuele resultaten uit het onderzoek terug te sturen naar mijn PGO bevindingen, zoals omschreven in de informatiebrief.\*

☒ Ik geef toestemming voor het informeren van mijn huisarts en/of behandelend specialist van onverwachte bevindingen die van belang (kunnen) zijn voor mijn gezondheid, zoals omschreven in de informatiebrief.

TERUG

ACCEPTEREN

# Mai+Science: Status participant

The screenshot shows a web browser window with the address bar displaying 'ibd-pilot.mai-science.nl/studies/5/#participants'. The page has a red header with the 'Mai+science' logo and a user profile icon. A navigation bar below the header contains links for 'DASHBOARD', 'CONSENT & INFORMATION LETTER', 'MATCHING', 'PARTICIPANTS' (which is highlighted with a red underline), and 'QUESTIONNAIRES'. The main content area is titled 'Participants' and includes a subtitle 'View status of participants in this study'. It states 'Following 1 participants' and provides a note: 'Note that the status of each participant is subject to change, because participants are allowed to revoke or accept their informed consents at any time.' Below this is a table with two columns: 'Identifier' and 'Status'. The table contains one row with the identifier 'd900221f-2ea7-472c-9c1a-b0dbd1f73fe7' and a green 'Accepted' status badge. The footer of the page displays 'Mai+Science'.

| Identifier                           | Status   |
|--------------------------------------|----------|
| d900221f-2ea7-472c-9c1a-b0dbd1f73fe7 | Accepted |

# Mai+Science: Questionnaires

The screenshot shows a web browser window with the address bar displaying 'ibd-pilot.mai-science.nl/studies/5/#questionnaires'. The page has a red header bar with the 'Mai+science' logo and a user profile icon. Below the header is a navigation menu with the following items: DASHBOARD, CONSENT & INFORMATION LETTER, MATCHING, PARTICIPANTS, and QUESTIONNAIRES (which is currently selected). The main content area is titled 'Questionnaires' and contains a table with the following data:

| Title                 | Created on          | Participants (sent / total) |                      |
|-----------------------|---------------------|-----------------------------|----------------------|
| Vragenlijst IBD Pilot | 4 August 2021 14:04 | 1 / 1                       | <a href="#">EDIT</a> |

Below the table is a [CREATE](#) button. At the bottom of the page, the text 'Mai+Science' is displayed.

# Mai+Life: Vragenlijsten

The screenshot displays a web browser window with the address bar showing `https://ibd-pilot.mai-life.nl/app/onderzoek/umcg/`. The browser's address bar also shows the page title "Mai+Life" and the URL "vragenlijsten.umcg.nl/bc".

The website interface includes a top navigation bar with the following menu items: File, Edit, View, History, Bookmarks, Tools, and Help. The browser's address bar also shows the page title "Mai+Life" and the URL "vragenlijsten.umcg.nl/bc".

The main content area is titled "Onderzoek" (Research) and features a sidebar with icons for Home, Onderzoek, and UMCG. The main content area displays the UMCG logo and a message: "Het onderzoeksdashboard met informatie over uw deelname aan studies vanuit het UMCG".

The dashboard is divided into two main sections:

- Uitnodigingen** (Invitations): This section contains a list of invitations for studies. The first entry is "IBD Pilot voor Mai+Life" with the status "Geaccepteerd" (Accepted).
- Vragenlijsten** (Questionnaires): This section contains a list of questionnaires for studies. The first entry is "Vragenlijst IBD Pilot" with the status "IBD Pilot voor Mai+Life".

The bottom of the page features a footer with links for "Over" (About), "Privacy", and "Contact".
