# Supplementary figures and images for: Personal Health Record for Personalizing Research and Care Trajectories: A Proof of Concept Pilot with Diet in Inflammatory Bowel Diseases
Source: MDPI journal article supplement (doi:10.3390/jpm13040601), 2023-03-29

## Voedingsadvies

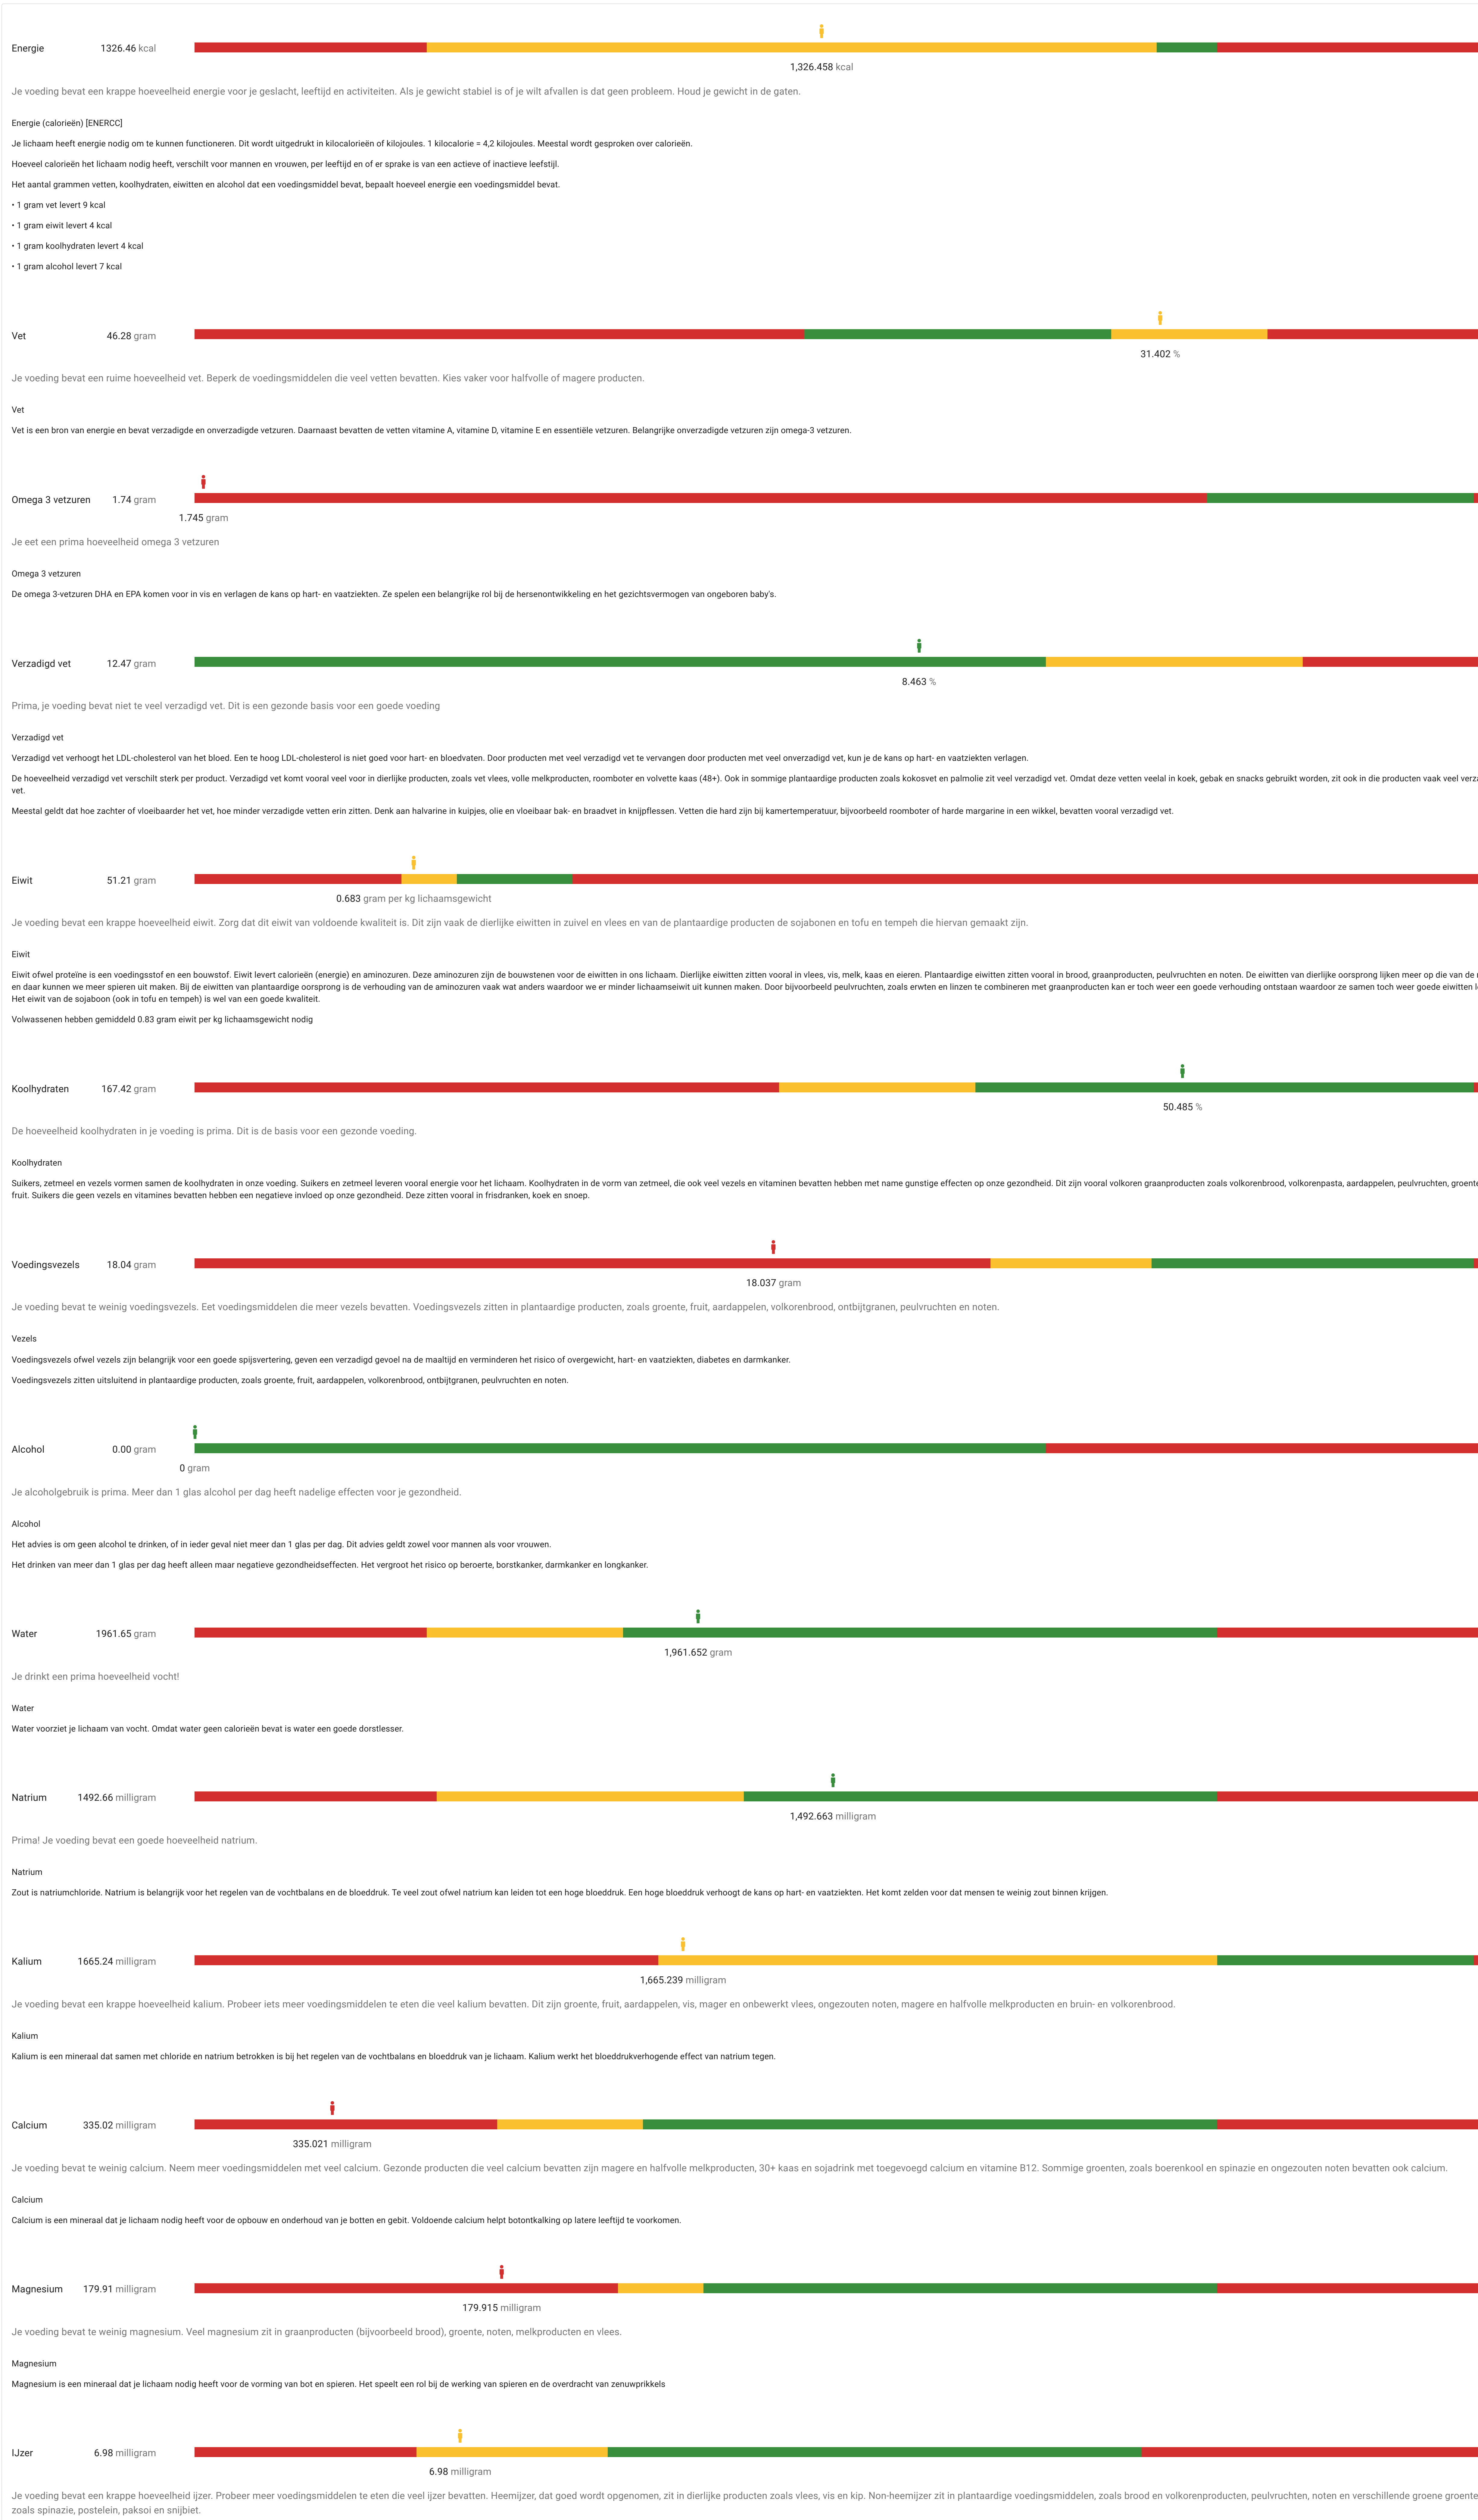

Supplement: s1 [file s1]
